# Supplementary material for: Biological and Management-Related Predictors of Reproductive Success in North American Ex Situ Asian Small-Clawed Otters (Aonyx cinereus)
Source: MDPI journal article supplement (doi:10.3390/jzbg4030042), 2023-09-07
Supplement: s1 [file s1]

Archive with 2 entries (2 files):
- jzbg-2506271-supplementary-survey AF Edits File S1 ASCO Initial Habitat Survey.pdf
- jzbg-2506271-supplementary1 AF Edits File S2 ASCO Follow-Up Habitat Survey.pdf
