# Supplementary material for: Biological and Management-Related Predictors of Reproductive Success in North American Ex Situ Asian Small-Clawed Otters (Aonyx cinereus)
Source: MDPI journal article supplement (doi:10.3390/jzbg4030042), 2023-09-07
Supplement: s1 [file s1]

Supplementary

# Biological and Management-Related Predictors of Reproductive Success in North American Ex Situ Asian Small-Clawed Otters (*Aonyx cinereus*)

Ashley D. Franklin <sup>1,\*</sup>, Monica M. McDonald <sup>1</sup>, Mary Agnew <sup>1</sup>, Sarah Duncan <sup>2</sup> and David M. Powell <sup>1</sup>

## Brief ASCO Follow-Up Survey

Please complete this survey and email it back as an attachment to Monica McDonald at [contraception@stlzoo.org](mailto:contraception@stlzoo.org) by September 1, 2019.

Name of Person filling out the survey: \_\_\_\_\_  
Email: \_\_\_\_\_ Phone: \_\_\_\_\_  
Institution Name: \_\_\_\_\_

## WATER DEPTH AND WATER AREA

Please answer the questions below *for every water pool* that the ASCO *regularly* have access to (both on and off exhibit) (more than 2 times/week). **DO NOT** count rivers, streams, or waterfall features that are less than 2ft deep.

If possible, please provide the dimensions of your pools (and living spaces) based upon blueprints, as well volume of water used in the pools. If blueprints, etc., are not available, please measure your min and max pool dimensions based upon the examples below.

**Pool shape examples:** Use these examples to help understand where to measure for the requested min and max measurements for each pool below. *Note, if your pool is exactly rectangular or oval, your min and max widths and min and max lengths will be the same. Also, we understand that measuring curves can be difficult; do the best you can with a tape measure.*

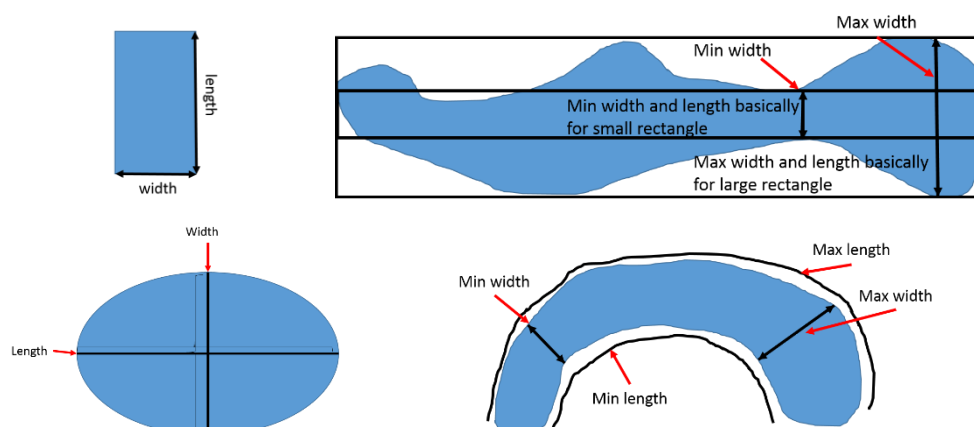

**Type of pool entry:** Please use these three pool entry style examples when completing the last question for each pool below.

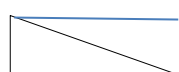

Gradient

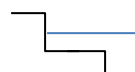

Step

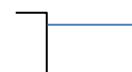

Drop-off

**Pool 1 (in feet):** max depth \_\_\_\_\_ft; max length \_\_\_\_\_ft; min length \_\_\_\_\_ft;  
max width \_\_\_\_\_ft; min width \_\_\_\_\_ft  
Can this pool be best characterized as circular or square/rectangle-shaped?

What is the volume of water used (gallons) for this pool (if known)? -

This pool can be characterized as having which type of entry shown above?

**Pool 2 (in feet):** max depth \_\_\_\_\_ft; max length \_\_\_\_\_ft; min length \_\_\_\_\_ft;  
max width \_\_\_\_\_ft; min width \_\_\_\_\_ft  
Can this pool be best characterized as circular or square/rectangle-shaped?

What is the volume of water used (gallons) for this pool (if known)? -

This pool can be characterized as having which type of entry shown above?

**Pool 3 (in feet):** max depth \_\_\_\_\_ft; max length \_\_\_\_\_ft; min length \_\_\_\_\_ft;  
max width \_\_\_\_\_ft; min width \_\_\_\_\_ft  
Can this pool be best characterized as circular or square/rectangle-shaped?

What is the volume of water used (gallons) for this pool (if known)? -

This pool can be characterized as having which type of entry shown above?

**Pool 4 (in feet):** max depth \_\_\_\_\_ft; max length \_\_\_\_\_ft; min length \_\_\_\_\_ft;  
max width \_\_\_\_\_ft; min width \_\_\_\_\_ft  
Can this pool be best characterized as circular or square/rectangle-shaped?

What is the volume of water used (gallons) for this pool (if known)? -

This pool can be characterized as having which type of entry shown above?

### SIZE OF ENTIRE LIVING SPACE

*Please answer the questions below for every living space that the ASCO regularly have access to (both on and off exhibit) (more than 2 times/week).*

**Living Space 1 (in feet):** max length \_\_\_\_\_ft; min length \_\_\_\_\_ft;  
max width \_\_\_\_\_ft; min width \_\_\_\_\_ft  
Can this living space be best characterized as circular or square/rectangle-shaped?

Does this living space have any vertical features that would increase their useable land space by more than 20%? **Yes / No**

If yes, please explain:

Is this a mixed-species exhibit (e.g. otter and another species are always housed together)? **Yes/No**

If yes, what other species is housed here? \_\_\_\_\_

Is this a rotational exhibit (e.g. otter and another species share the space, but never at the same time)? **Yes/No**

If yes, what other species is housed here? \_\_\_\_\_

**Living Space 2 (in feet):** max length \_\_\_\_\_ ft; min length \_\_\_\_\_ ft;  
 max width \_\_\_\_\_ ft; min width \_\_\_\_\_ ft  
 Can this living space be best characterized as circular or square/rectangle-shaped?

Does this living space have any vertical features that would increase their useable land space by more than 20%? **Yes / No**

If yes, please explain:

Is this a mixed-species exhibit (e.g. otter and another species are always housed together)? **Yes/No**

If yes, what other species is housed here? \_\_\_\_\_

Is this a rotational exhibit (e.g. otter and another species share the space, but never at the same time)? **Yes/No**

If yes, what other species is housed here? \_\_\_\_\_

**Living Space 3 (in feet):** max length \_\_\_\_\_ ft; min length \_\_\_\_\_ ft;  
 max width \_\_\_\_\_ ft; min width \_\_\_\_\_ ft  
 Can this living space be best characterized as circular or square/rectangle-shaped?

Does this living space have any vertical features that would increase their useable land space by more than 20%? **Yes / No**

If yes, please explain:

Is this a mixed-species exhibit (e.g. otter and another species are always housed together)? **Yes/No**

If yes, what other species is housed here? \_\_\_\_\_

Is this a rotational exhibit (e.g. otter and another species share the space, but never at the same time)? **Yes/No**

If yes, what other species is housed here? \_\_\_\_\_

**Living Space 4 (in feet):** max length \_\_\_\_\_ ft; min length \_\_\_\_\_ ft;  
 max width \_\_\_\_\_ ft; min width \_\_\_\_\_ ft  
 Can this living space be best characterized as circular or square/rectangle-shaped?

Does this living space have any vertical features that would increase their useable land space by more than 20%? **Yes / No**

If yes, please explain:

Is this a mixed-species exhibit (e.g. otter and another species are always housed together)? **Yes/No**

If yes, what other species is housed here? \_\_\_\_\_

Is this a rotational exhibit (e.g. otter and another species share the space, but never at the same time)? **Yes/No**

If yes, what other species is housed here? \_\_\_\_\_

If more than 1 pool or living space is noted, which pool(s) go with which living space (s)?  
 (e.g. Pool 1 is in Living Space 1 OR Pool 1 & 2 are in Living Space 1)

---

---

---

---

---
